# Supplementary material
Source: PubMed Central journal article supplement (PMC2761373)
Supplement: 0909377106_0909377106SI.pdf [file 0909377106_0909377106SI.pdf]

# Supporting Information

Sims et al. 10.1073/pnas.0909377106

## SI Text

### Supplementary Materials and Methods

**FFP Alignment-Free Genome Comparison.** All of the genomic partitions were compared with one another by using the FFP alignment-free method. The genome sequence is converted first to an purine–pyrimidine base alphabet. This strategy considers only transversion events between the two types of bases in the genome (purines and pyrimidines). This is based on the observation that mutational rates vary broadly across species, but the transversion rate is much slower than the transition rate (1). Furthermore, this strategy dramatically reduces the computational memory requirement that otherwise prevents application of the FFP method for the large genomes of mammals. The sequence is divided into overlapping features, or  $l$ -mers, of a given length or resolution,  $l$ . The feature frequencies are then used as the basis for genome comparison. To count the frequencies of each feature in the genome, a sliding window of length  $l$  is run through the sequence from position 1 to  $n - l + 1$ . When counting,  $l$ -mers continue over the whole genome, but the sliding window is not allowed to span over gaps or “x” characters from sequence concatenation between contigs. Also, the forward and reverse complement word (features) are considered equivalent. The counts are tabulated in the vector  $C_l$  for all possible features of length  $l$ ,

$$C_l = \langle c_{l,1}, \dots, c_{l,K} \rangle \quad [1]$$

where  $K$  is the number of all possible features of length  $l$ . For an odd length  $l$ , the number of features is

$$K = 2^{l-1} \quad [2]$$

and for even length  $l$

$$K = (2^l + 2^{l/2})/2 \quad [3]$$

Note that Eqs. S2 and S3 are a result of forward/reverse complement equivalency. The raw frequency counts are normalized to form a probability distribution vector or FFP,  $F_l$ , giving the relative abundance of each  $l$ -mer. This normalization removes small genome length differences as a factor in the comparison. The distance between two probability vectors  $P_l$  and  $Q_l$  is calculated by using the Jensen-Shannon (JS) divergence (2),

$$JS_l(P_l, Q_l) = \frac{1}{2} KL(P_l, M_l) + \frac{1}{2} KL(Q_l, M_l) \quad [4]$$

where  $M_l = (P_l + Q_l)/2$  and KL is the Kullback–Leibler divergence (3),

$$KL(P_l, M_l) = \sum_{i=1}^K p_{l,i} \log_2 \frac{p_{l,i}}{m_{l,i}} \quad [5]$$

A matrix composed of pair-wise divergences is used as input to the neighbor-joining tree-construction method.

**Feature Filtering for Mammalian Genomes.** Two forms of feature filtering were applied for each class of genome partitions: (i) feature complexity and (ii) feature frequency. Mammal genomes contain a large fraction of sequence which is repetitive or of low complexity. The complexity of a feature,  $K_f$ , is determined by comparing its size in bytes, before and after Lempel–Ziv lossless compression (4).

$$K_f = |s - s_{compress}| \quad [6]$$

The compression is implemented by using the gzip utility (gzip –9). The complexity of  $l$ -mers for a given  $l$  is normally distributed, and we choose only the high-complexity features, where  $K_f$  is greater than the one standard deviation ( $\sigma$ ) below the average complexity ( $\mu$ ), or  $\mu - \sigma$ . Also, high-frequency features should be disregarded because they are not sensitive for distinguishing different genomes, and these features dominate the JS divergence score. The average and standard deviation of the count values,  $c_{l,i}$  for all genomes were calculated for each class of genome partitions, and we chose only those features with  $c_{l,i} < \mu + \sigma$ .

**Assessment of Feature Correlation.** Many features in each FFP are correlated, that is to say, when frequencies are examined across species the correlation among features is high. This correlation arises from two sources: (i) from the “sliding frame” method of identifying features, where features may be a connected part of a larger motif, and (ii) from possible redundancy related to an evolutionary signal. In the latter case, feature frequencies are not independent of each other, but are dependently related to each other via common lines of species divergence. We wanted to assess the extent of correlation to determine whether removal of a large number of features through the process of filtering ( $\approx 30$ – $40\%$  for each class of genome partitions) could be eliminating the phylogenetic signal. For a particular  $l$ , two features were determined to be redundant at two levels if they have  $\rho = 1$  or  $\rho > 0.98$  (Spearman’s rank correlation) in frequencies across species. The former threshold is equivalent to equal rankings and the latter to a difference in two ranks. Calculating a large feature-correlation matrix is prohibitive, so redundancy was estimated by repeatedly ( $n$  times) sampling a smaller set of  $m$  features and calculating this smaller correlation matrix. If the occurrence of redundancy in the sampled matrix is thought of as a sample from a Poisson process, the expected total percent redundancy of the complete matrix can be estimated via maximum likelihood :

$$R = \frac{100_k C_2}{k n_m C_2} \sum_{i=1}^n r_i \quad [7]$$

where  $r_i$  is the number of feature pairs that are correlated above the threshold in sample  $i$ ,  $k$  is the total number of features (Eqs. S2 and S3), and  $n = 10^4$ , and  $m = 10^3$ . This procedure was repeated for all classes of genome partitions. The percent redundancies for each of the partitions for  $l = 18$  at  $\rho = 1$  were: whole, 4.15%; intronic, 5.04%; nongenic, 4.24%; exonic, 4.38%. At  $\rho > 0.98$  the percent redundancies were: whole, 43.2%; intronic, 48.1%; nongenic, 41.3% .

1. Collins DW, Jukes TH (1994) Rate of transition and transversion in coding sequences since the human–rodent divergence. *Genomics* 20:386–396.

2. Lin J (1991) Divergence measures based on the Shannon entropy. *IEEE Trans Info Theory* 37:145–151.

3. Kullback S, Leibler RA (1951) On information and sufficiency. *Ann Math Stat* 22:79–86.

4. Ziv J, Lempel A (1978) Compression of individual sequences via variable-rate coding. *IEEE Trans Info Theory* 24:530–536.

**Table S1. Gene-tree topology types**

|                  |                                                      | K2-Neighbor-joining tree types |                                                      |
|------------------|------------------------------------------------------|--------------------------------|------------------------------------------------------|
| Type I           |                                                      | Type II                        |                                                      |
| Chrm1            | cholinergic receptor, muscarinic 1                   | Chrm1- <i>RY</i>               | cholinergic receptor, muscarinic 1                   |
| Clock- <i>RY</i> | circadian locomoter output cycles kaput              | Clock                          | circadian locomoter output cycles kaput              |
| Cnr1- <i>RY</i>  | cannabinoid receptor 1                               | Cnr1                           | cannabinoid receptor 1                               |
| Lamc2- <i>RY</i> | laminin, gamma 2                                     | Lamc2                          | laminin, gamma 2                                     |
| Nd1              | MT-NADH dehydrogenase 1                              | Nd1- <i>RY</i>                 | MT-NADH dehydrogenase 1                              |
| Plcb4- <i>RY</i> | phospholipase C, beta 4                              | Plcb4                          | phospholipase C, beta 4                              |
| Rbp3             | retinol binding protein 3, interstitial              | Rbp3- <i>RY</i>                | retinol binding protein 3, interstitial              |
| Zfx- <i>RY</i>   | zinc finger protein, X-linked                        | zfx                            | zinc finger protein, X-linked                        |
| Cenpb- <i>RY</i> | centromere protein B                                 | Cenpb                          | centromere protein B                                 |
| Prom1            | prominin 1                                           | Ptprb                          | protein tyrosine phosphatase, receptor type, B       |
| Bmi1             | Bmi1 polycomb ring finger oncogene                   | Cytb                           | MT-cytochrome b                                      |
| Ets1             | v-ets erythroblastosis virus E26 oncogene homolog 1  | Eftud2                         | elongation factor Tu GTP binding domain containing 2 |
| Ets2             | v-ets erythroblastosis virus E26 oncogene homolog 2  | Dscam                          | Down's syndrome cell-adhesion molecule               |
| Rag1             | recombination activating gene 1                      | Runx1                          | runt-related transcription factor 1                  |
| Rag2             | recombination activating gene 2                      | Tyr                            | tyrosinase                                           |
| Bdnf             | brain-derived neurotrophic factor                    | Pax6                           | paired box 6                                         |
| Eftud1           | elongation factor Tu GTP binding domain containing 1 | Fgg                            | fibrinogen gamma chain                               |
| gzmb             | granzyme B precursor                                 | Adora3                         | adenosine A3 receptor                                |
| Csnk2b           | casein kinase 2B                                     | Adra2b                         | adrenergic receptor, alpha 2b                        |
| Kcnj5            | potassium inwardly-rectifying channel, J5            | Akirin2                        | akirin 2                                             |
| Atxn1- <i>RY</i> | ataxin 1                                             | App                            | amyloid beta (A4) precursor protein                  |

*RY* indicates the topology of the tree after the alignment was reduced to purine/pyrimidine characters.
